# Supplementary material for: Investigation into the importance of using natural PVCs and pathological models for potential-based ECGI validation
Source: Frontiers journal article supplement (doi:10.3389/fphys.2023.1198002), 2023-05-18
Supplement: Data_Sheet_1.PDF [file Data_Sheet_1.PDF]

## Supplementary Material

### 1 SUPPLEMENTARY FIGURES

#### 1.1 Figures

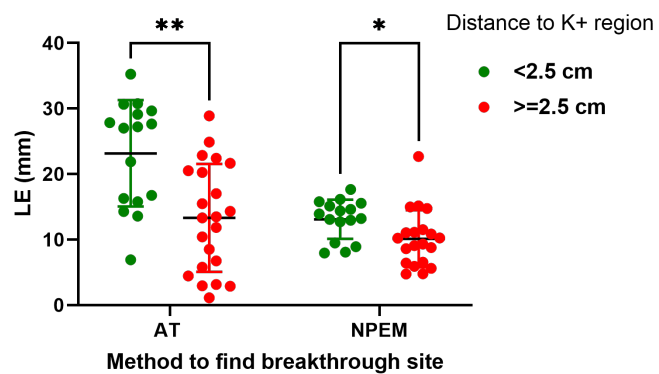

**Figure S1.** PVCs LE's during high K+ perfusion were separated into those close to (<25mm) and far from (≥25mm) the border of the perfusion bed for both NPEM and AT methods.
